# Supplementary material for: An Efficient Kinetic Model for Assemblies of Amyloid Fibrils and Its Application to Polyglutamine Aggregation
Source: PubMed Central journal article supplement (PMC3496744; doi:10.1371/journal.pone.0043273), 2012-11-13
Supplement: pone.0043273.s007.pdf [file pone.0043273.s007.pdf]

# Supporting Information of the article : An Efficient Kinetic Model for Assemblies of Amyloid Fibrils and Its Application to Polyglutamine Aggregation

## Supplementary data S2: Application to PolyQ41 polymerization

Parameters of the PDE model [9]-[12] were estimated using experimental data on PolyQ41 polymerization measured by ThT. Two independent sets of experiments were carried out, using two different devices. The PolyQGST initial concentration ranged from  $20\mu M$  to  $420\mu M$ . For experimental set 1, there were 9 curves for the concentration  $100\mu M$ , 13 for  $285\mu M$  and 3 for  $420\mu M$ . For experimental set 2, there were one curve for each concentration  $20, 30, 40, 50$  and  $80\mu M$ .

We first tested our model by considering each experimental curve separately and thus computing a parameter set for each of them (see Main Text). We set  $k_{on}^{min} = 1h^{-1}M^{-1}$ ,  $x_1 = 0.1i_{max}$ . An example of this parameter estimation is shown in Figure S1 for an initial PolyQGST concentration equal to  $100\mu M$ , in which  $i_0$  was set to 3. For any value of  $i_0$  among 1, 2, 3 or 4, the fit was excellent for all curves: in a least-square approach, we computed the error in  $L^2$  adimensioned norm, calculated as  $\frac{\|f^{mes} - f^{sim}\|_{L^2}}{\|f^{mes}\|_{L^2}}$ , where  $\|f\|_{L^2} = \sqrt{\sum_i f_i^2}$ , the values  $f_i$  being measured values at time  $t_i$  for the notation  $f^{mes}$  and simulated values at time  $t_i$  for the notation  $f^{sim}$ . These errors ranged from 0.5% to 2%.

Secondly, we tested our model by fitting all curves of a given set of experiments simultaneously. Best-fits for experimental set 1 are drawn in Figures S2 and S3, respectively for  $i_0 = 3$  and  $i_0 = 1$ . Global estimation errors for the two experimental sets ranged from 5% to 61% and decreased with  $i_0$  value (Table S1).

The larger  $i_0$  is, the more the lag-time changes with the concentration. Moreover, this dependence is too strong as soon as  $i_0 \geq 2$ . Indeed, for the lower concentrations, the simulation is too slow compared to experimental data, whereas it is too fast for the higher one, as shown for  $i_0 = 3$  in Figure S2.

## Figure Legends

**Figure S 1. Parameter estimation considering each curve separately.** Time evolution of PolyQ41 polymerized mass for an initial PolyQGST concentration equal to  $285\mu M$ . The experimental results are plotted in dotted line and the best-fit curve in solide line.  $i_0$  is set to 3. Best-fit parameters are  $k_I^+ = 0.67h^{-1}$ ,  $k_I^- = 0$ ,  $k_{on}^N = 7.8.10^2M^{-2}h^{-1}$ ,  $k_{off}^N = 5.10^{-2}h^{-1}$ ,  $k_{on}^{max} = 1.2.10^9M^{-1}h^{-1}$ ,  $i_{max} = 2.10^6$ ,  $x_2 = 0.2i_{max}$ .

**Figure S 2. Parameter estimation for Experimental Set 1 when  $i_0$  is set to 3.** Time evolution of the adimensioned PolyQ41 polymerized mass for an initial PolyQGST concentration equal to  $100\mu M$  (A),  $285\mu M$  (B),  $420\mu M$  (C). Dotted curves represent experimental results. The solid curve is the best-fit. The global error in  $L^2$  adimensioned norm was equal to 40% and the optimal parameters are very close to those of Figure 1.

**Figure S 3. Parameter estimation for Experimental Set 1 when  $i_0$  is set to 1.** Time evolution of the adimensioned PolyQ41 polymerized mass for an initial PolyQGST concentration equal to  $100\mu M$  (A),  $285\mu M$  (B),  $420\mu M$  (C). Dotted curves represent experimental results. The solid curve is the best-fit. The global error in in  $L^2$  adimensioned norm was equal to 11%. The best-fit parameters are  $k_I^+ = 0.65h^{-1}$ ,  $k_I^- = 0$ ,  $k_{on}^N = 7.10^{-6}M^{-1}h^{-1}$ ,  $k_{off}^N = 5.10^{-2}h^{-1}$ ,  $k_{on}^{max} = 2.3.10^9M^{-1}h^{-1}$ ,  $x_2 = 0.1i_{max}$ ,  $i_{max} = 5.10^6$ .

## Tables

**Table S 1. Optimization results**

| $i_0$ | Minimal error (adimensioned $L^2$ norm) |                           |
|-------|-----------------------------------------|---------------------------|
|       | First set of experiments                | Second set of experiments |
| 1     | 11%                                     | 5%                        |
| 2     | 37%                                     | 7%                        |
| 3     | 44%                                     | 9%                        |
| 4     | 59%                                     | 29%                       |
